# Trends in stroke incidence among elderly low-income residents of rural China: a population-based study from 1992 to 2016

Hongyan Lu<sup>1,2,\*</sup>, Zaiyu Guo<sup>3,\*</sup>, Jie Liu<sup>1,2,4</sup>, Heliang Zhang<sup>3</sup>, Wei Zhao<sup>3</sup>, Yanan Wu<sup>1,2,4</sup>, Jingxian Ni<sup>1,2,4</sup>, Wei Liu<sup>1</sup>, Jun Tu<sup>1,2,4</sup>, Jinghua Wang<sup>1,2,4</sup>, Xianjia Ning<sup>1,2,4</sup>, Jianning Zhang<sup>2,5</sup>

<sup>1</sup> Department of Neurology, Tianjin Medical University General Hospital, Tianjin, 300052, China

<sup>2</sup> Tianjin Neurological Institute, Key Laboratory of Post-Neuroinjury Neuro-repair and Regeneration in Central Nervous System, Ministry of Education and Tianjin City, Tianjin 300052, China

<sup>3</sup> Department of Neurology, Tianjin TEDA Hospital, Tianjin, 300457, China

<sup>4</sup> Laboratory of Epidemiology, Tianjin Neurological Institute, Tianjin 300052, China

<sup>5</sup> Department of Neurosurgery, Tianjin Medical University General Hospital, Tianjin, 300052, China

\*Equal contribution

**Correspondence to:** Xianjia Ning, Jianning Zhang, Jinghua Wang; **email:** [xin0906@gmail.com](mailto:xin0906@gmail.com), [jianningzhang@hotmail.com](mailto:jianningzhang@hotmail.com), [jhw8799@yahoo.com](mailto:jhw8799@yahoo.com)

**Keywords:** stroke, incidence, epidemiology, elderly, trends

**Received:** July 4, 2018

**Accepted:** November 15, 2018

**Published:** November 28, 2018

**Copyright:** Lu et al. This is an open-access article distributed under the terms of the Creative Commons Attribution License (CC BY 3.0), which permits unrestricted use, distribution, and reproduction in any medium, provided the original author and source are credited.

## ABSTRACT

In China, >70% of stroke deaths occur in people aged  $\geq 65$  years. However, trends in the stroke incidence among elderly people are unclear. We aimed to determine trends in the stroke incidence among elderly people in rural China. This was a population-based surveillance study conducted in Tianjin, China. Stroke events and all deaths were registered annually. Trends and annual proportion of change in incidence of first-ever stroke were evaluated from 1992 to 2016. The age-standardized incidence of first-ever stroke increased annually by 3.7% overall in elderly people (2.7% for men; 5.0% for women; all  $P < 0.05$ ). However, from 2008 to 2016, there was no significant change in the trends of stroke incidence among elderly people, across gender and subtypes. The proportion of elderly patients with first-ever stroke decreased by 1.1% annually. In contrast to young patients, annual changes in the incidence of stroke tended to be slight in elderly patients (3.7% vs. 9.5%) with greater increase in female patients than those in male patients (2.7% vs. 10.3% for men; 5.0% vs. 8.9% for women). Thus, the control of risk factors for stroke among elderly people is crucial, especially among older women, to reduce the burden of stroke in China.

## INTRODUCTION

Stroke was the leading disease burden worldwide in 2013 [1]. The age-standardized incidence of stroke in high-income countries decreased by 12% between 1990 and 2010, while that in low- and middle-income countries increased by 12% [2].

The current prevalence of stroke in China appears to be

the highest among low- and middle-income countries (536–1040/100,000) [3–6]. The National Epidemiological Study of Stroke in China showed that the age-standardized prevalence, incidence, and mortality rates of stroke in China in 2012–2013 were 1115/100,000; 247/100,000; and 115/100,000; respectively [7]. The study on the global burden of disease conducted in 2013 showed that >70% of the stroke deaths occurred in people aged  $\geq 65$  years in China [8].

The incidence of stroke among rural residents was significantly higher than that among urban residents in China [7]. However, there have been few recent studies on the trends of stroke incidence in the elderly population, especially in rural low-income populations.

In the present study, we aimed to explore the trends in the incidence of first-ever stroke among elderly people aged  $\geq 65$  years in rural China from 1992 to 2016.

## RESULTS

### Characteristics of elderly patients with first-ever stroke

During the 362,596 person-years of follow-up in this study, 1188 patients experienced stroke overall, including 709 (59.7%) male patients. Patients aged  $\geq 65$  years, with an average age of 65.35 years (65.24 years in men and 65.52 years in women), accounted for 52.3% (621 cases). The average duration of education for stroke patients was  $3.36 \pm 3.28$  years overall ( $5.17 \pm 3.07$  and  $1.71 \pm 2.50$  years for those aged  $< 65$  and  $\geq 65$  years, respectively). The education duration (equivalent to elementary school level) was low both in patients aged  $< 65$  years and  $\geq 65$  years (5.2 years vs. 1.7 years), although it was significantly higher in patients aged  $< 65$  years than that in patients aged  $\geq 65$  years. The proportion of diagnosis by imaging (computerized tomography [CT]/magnetic resonance imaging [MRI]) improved from 1992 to 2016 (65.3% to 88.5%), but the rate of diagnosis via imaging was significantly lower in patients aged  $\geq 65$  years (67.3%) than in patients aged  $< 65$  years (92.9%). Young patients were more likely to have a higher prevalence of diabetes (14.3% vs 9.8%;  $P=0.018$ ) and current alcohol consumption (31.5% vs 17.0%;  $P<0.001$ ) than elderly patients. Moreover, the current smoking rate in men was higher in young patients than in elderly patients (72.6% vs 58.9%;  $P<0.001$ ), but a reverse trend was found in women (1.8% vs 6.2%,  $P=0.014$ ; Table 1).

### Trends in the incidence of first-ever stroke among elderly patients by sex and stroke subtype

The age-standardized incidence of first-ever stroke per 100,000 person-years was 970.44 in 1992 and 2349.35 in 2016 in those aged  $\geq 65$  years. Regarding the stroke subtype, the corresponding incidence rates in 1992 and 2016 were 426.13 and 285.11 for intracerebral hemorrhage (ICH) and 544.31 and 1888.90 for ischemic stroke (IS), respectively.

From 1992 to 2016, the age-standardized incidence of stroke in elderly patients increased by 3.7% (95%

confidence interval [CI]: 1.4, 6.0) per year overall: 2.7% (95% CI: 0.9, 4.6) for men; and 5.0% (95% CI: 2.1, 7.9) for women (all  $P<0.05$ ). More specifically, the age-standardized incidence significantly increased for IS both in men and women aged  $\geq 65$  years (total, 5.5%; men, 4.5%; and women, 6.8%; all  $P<0.05$ ). For ICH, there were no significant trends in age-standardized incidence (all  $P>0.05$ ).

However, from 2008 to 2016, there was no significant change in the trends of stroke incidence among elderly patients, across gender and subtypes (Table 2).

### Proportion of first-ever stroke in elderly patients by sex and subtypes

From 1992 to 2016, the proportion of elderly stroke patients in the entire stroke population decreased from 84.2% to 52.4% overall: 81.8% to 50.7% for IS; and 87.5% to 50.0% for ICH. The proportion of elderly patients with first-ever stroke dropped by an average of 1.1% (95% CI: -1.8, -0.4;  $P<0.05$ ) per year overall: 0.8% (95% CI: -1.5, -0.1;  $P<0.05$ ) for IS; and 1.8% (95% CI: -2.8, -0.9;  $P<0.05$ ) for ICH. The corresponding rates were 1.5% (95% CI: -2.2, -0.8) overall: 1.1% (95% CI: -1.8, -0.4) for IS; and 2.7% (95% CI: -1.0, -1.5) for ICH. The decline in the proportion of elderly stroke patients was not statistically significant in women (all  $P>0.05$ ; Table 3).

### Annual trends in the incidence of first-ever stroke in elderly patients compared to young patients from 1992 to 2016 by subtypes

Between 1992 and 2016, the incidence of first-ever stroke in patients aged  $< 65$  years increased by 9.5% (men, 10.3%; women, 8.9%) annually and were greater than that in patients aged  $\geq 65$  years by 3.7% (men, 2.7%; women, 5.0%). There was a similar trend for IS (total, 10.0% vs. 5.5%; men, 9.9% vs. 4.5%; women, 9.5% vs. 6.8%; all  $P<0.05$ ). In contrast to findings in elderly patients, the incidence of ICH increased by 9.1% per year for those aged  $< 65$  years. Moreover, the increase was significantly higher in women than that in men among patients aged  $\geq 65$  years, with a rate of 6.8% vs. 4.5% for IS and 5.0% vs. 2.7% overall (all  $P<0.05$ ). However, the opposite trend was observed among the younger patients, with a rate of 9.9% vs. 9.5% for IS and 10.3% vs. 8.9% overall (all  $P<0.05$ ).

Over time, the incidence of stroke in the patients aged  $< 65$  years continued to increase, while rates of change in the patients aged  $\geq 65$  years tended to slow down in degree, both for total stroke and IS (Table 4; Figure 1).

**Table1. The descriptive characteristics of patients with first-ever stroke in this study by sex and periods.**

| Characteristics                                   | Men          |              |               | Women        |              |               | Total        |              |               |
|---------------------------------------------------|--------------|--------------|---------------|--------------|--------------|---------------|--------------|--------------|---------------|
|                                                   | ≥65 years    | <65 years    | Overall       | ≥65 years    | <65 years    | Overall       | ≥65 years    | <65 years    | Overall       |
| <b>Cases, n (%)</b>                               | 371 (52.3)   | 338 (47.7)   | 709 (59.7)    | 250 (52.2)   | 229 (47.8)   | 479 (40.3)    | 621 (52.3)   | 567 (47.7)   | 1188 (100)    |
| <b>Person-year</b>                                | 19393        | 169189       | 188582        | 19889        | 154085       | 173974        | 39282        | 323314       | 362596        |
| <b>Age of onset, mean (SD), year</b>              | 74.03 (6.13) | 55.60 (6.90) | 65.24 (11.28) | 75.02 (6.28) | 55.14 (7.50) | 65.52 (12.09) | 74.43 (6.21) | 55.41 (7.15) | 65.35 (11.61) |
| <b>Education level, mean (SD), year:</b>          | 2.12 (2.67)  | 5.86 (2.88)  | 3.90 (3.34)   | 1.09 (2.07)  | 4.15 (3.07)  | 2.56 (3.01)   | 1.71 (2.50)  | 5.17 (3.07)  | 3.36 (3.28)   |
| <b>Diagnosis by CT/MRI, n (%)</b>                 | 247 (66.6)   | 313 (92.6)   | 560 (79.0)    | 171 (68.4)   | 214 (93.4)   | 385 (80.4)    | 418 (67.3)   | 527 (92.9)   | 945 (79.5)    |
| <b>Hypertension, n (%): n=1176</b>                | 527 (88.6)   | 508 (89.9)   | 1035 (88.0)   | 310 (84.7)   | 301 (89.3)   | 611 (86.9)    | 527 (88.6)   | 508 (89.9)   | 1035 (88.0)   |
| <b>DM, n (%): n=1163</b>                          | 24 (6.6)     | 35 (10.4)    | 59 (8.4)      | 35 (14.6)    | 45 (20.1)    | 80 (17.2)     | 59 (9.8)     | 80 (14.3)    | 139 (12.0)    |
| <b>Hyperlipemia, n (%): n=1138</b>                | 35 (9.8)     | 31 (9.5)     | 69 (9.7)      | 27 (11.6)    | 43 (19.3)    | 74 (15.4)     | 62 (10.5)    | 74 (13.5)    | 143 (12.0)    |
| <b>Current smoking, n (%): n=1171</b>             | 215 (58.9)   | 244 (72.6)   | 459 (65.5)    | 15 (6.2)     | 4 (1.8)      | 19 (4.0)      | 230 (37.8)   | 248 (44.0)   | 478 (40.8)    |
| <b>Current alcohol consumption, n (%): n=1171</b> | 102 (27.9)   | 176 (52.5)   | 278 (39.7)    | 2 (0.8)      | 1 (0.4)      | 3 (0.6)       | 104 (17.1)   | 177 (31.5)   | 281 (24.0)    |

**Table 2. Trends in incidence of first-ever stroke per 100000 person-year in elderly population during 1992 to 2016 by sex and subtypes.**

| Year        | ICH           |               |               | IS              |                 |                 | Total           |                 |                 |
|-------------|---------------|---------------|---------------|-----------------|-----------------|-----------------|-----------------|-----------------|-----------------|
|             | Men           | Women         | Total         | Men             | Women           | Total           | Men             | Women           | Total           |
| <b>1992</b> | 583.15(87.34) | 257.99(59.69) | 426.13(53.50) | 583.15(87.34)   | 501.66(83.22)   | 544.31(60.46)   | 1166.30(123.48) | 759.65(102.39)  | 970.44(80.72)   |
| <b>1993</b> | 719.13(97.82) | 234.90(56.18) | 478.74(56.58) | 810.07(103.82)  | 212.34(53.42)   | 512.61(58.54)   | 1529.20(142.59) | 447.25(77.52)   | 991.15(81.38)   |
| <b>1994</b> | 236.63(56.39) | 0             | 116.69(27.91) | 851.70(106.95)  | 849.71(106.11)  | 850.17(75.30)   | 1088.33(120.88) | 849.71(106.11)  | 966.85(80.30)   |
| <b>1995</b> | 344.09(67.90) | 129.79(40.74) | 227.40(38.57) | 615.33(90.79)   | 533.21(82.55)   | 583.00(61.75)   | 959.43(113.35)  | 663.00(92.05)   | 810.41(72.80)   |
| <b>1996</b> | 616.29(90.74) | 130.33(40.54) | 370.17(49.00) | 808.62(103.93)  | 522.85(81.18)   | 658.30(65.34)   | 1424.91(137.92) | 653.19(90.73)   | 1028.48(81.65)  |
| <b>1997</b> | 360.83(69.35) | 0             | 176.32(33.74) | 698.66(96.48)   | 0               | 335.25(46.51)   | 1059.48(118.79) | 0               | 511.57(57.45)   |
| <b>1998</b> | 463.89(78.52) | 130.87(40.37) | 287.21(42.97) | 976.70(113.91)  | 84.15(32.37)    | 527.96(58.25)   | 1440.59(138.31) | 215.03(51.74)   | 1003.61(80.30)  |
| <b>1999</b> | 740.07(98.84) | 130.33(40.18) | 431.73(52.53) | 818.56(103.94)  | 130.33(40.18)   | 460.59(54.25)   | 1558.64(143.38) | 260.66(56.83)   | 893.32(75.54)   |
| <b>2000</b> | 125.39(40.30) | 261.21(56.71) | 191.91(34.80) | 1554.78(141.80) | 996.33(110.72)  | 1268.12(89.42)  | 1680.17(147.40) | 1257.54(124.37) | 2792.66(132.59) |
| <b>2001</b> | 224.34(53.76) | 211.46(50.87) | 216.94(36.90) | 1173.57(122.90) | 602.46(85.85)   | 880.78(74.32)   | 1397.91(134.12) | 813.93(99.77)   | 1097.72(82.97)  |
| <b>2002</b> | 97.77(35.36)  | 473.04(76.03) | 279.77(41.81) | 765.01(98.87)   | 503.00(78.40)   | 628.07(62.63)   | 862.78(104.99)  | 976.04(109.18)  | 907.84(75.29)   |
| <b>2003</b> | 124.89(39.83) | 421.63(71.69) | 278.84(41.65) | 1727.43(148.03) | 923.21(106.06)  | 1330.27(90.92)  | 1852.32(153.27) | 1344.84(127.98) | 1609.10(99.98)  |
| <b>2004</b> | 591.30(86.33) | 340.40(64.15) | 468.27(53.75) | 1094.27(117.41) | 996.14(109.70)  | 1013.14(79.04)  | 1685.57(145.67) | 1336.54(127.04) | 1490.41(95.85)  |
| <b>2005</b> | 125.39(39.94) | 133.38(40.38) | 323.15(44.88) | 1515.29(138.74) | 823.54(100.30)  | 1140.99(84.29)  | 1640.67(144.36) | 956.91(108.11)  | 1270.25(88.93)  |
| <b>2006</b> | 95.03(34.81)  | 0             | 42.80(16.36)  | 632.43(89.79)   | 290.57(59.70)   | 452.32(53.17)   | 727.46(96.29)   | 290.57(59.70)   | 495.12(55.63)   |
| <b>2007</b> | 733.69(96.89) | 480.35(76.61) | 582.86(60.36) | 1681.81(146.62) | 1504.29(135.51) | 1597.59(99.88)  | 2415.52(175.65) | 1984.65(155.61) | 2180.45(116.65) |
| <b>2008</b> | 319.59(64.04) | 78.33(31.35)  | 196.11(35.27) | 2422.16(176.12) | 1229.24(124.11) | 1796.01(106.66) | 2741.75(187.35) | 1307.57(128.00) | 1992.12(112.32) |
| <b>2009</b> | 316.13(63.41) | 360.48(67.50) | 328.44(45.63) | 2082.18(162.59) | 2213.06(167.08) | 2143.18(116.45) | 2398.31(174.47) | 2573.54(180.14) | 2471.62(125.04) |
| <b>2010</b> | 438.70(74.46) | 440.46(74.65) | 436.83(52.55) | 2034.00(160.19) | 944.94(109.32)  | 1490.52(97.02)  | 2472.69(176.59) | 1385.41(132.33) | 1927.36(110.31) |

|                  |                 |                 |                 |                 |                 |                 |                 |                  |                 |
|------------------|-----------------|-----------------|-----------------|-----------------|-----------------|-----------------|-----------------|------------------|-----------------|
| <b>2011</b>      | 124.89(39.73)   | 77.88(31.42)    | 109.29(26.30)   | 1221.21(124.18) | 882.61(105.72)  | 1050.19(81.48)  | 1346.10(130.36) | 960.49(110.28)   | 1159.48(85.62)  |
| <b>2012</b>      | 187.45(48.55)   | 299.76(61.75)   | 237.23(38.73)   | 1339.39(129.71) | 1485.22(137.36) | 1419.80(94.70)  | 1526.84(138.48) | 1784.98(150.56)  | 1657.02(102.29) |
| <b>2013</b>      | 212.52(51.12)   | 415.11(71.84)   | 304.18(43.37)   | 3041.05(193.11) | 1971.07(156.56) | 2507.15(124.36) | 3253.55(199.72) | 2386.18(172.07)  | 2811.32(131.67) |
| <b>2014</b>      | 462.75(75.71)   | 153.13(43.34)   | 319.39(44.37)   | 1106.10(117.01) | 1721.59(145.22) | 1425.47(93.68)  | 1568.85(139.32) | 1874.72(151.52)  | 1744.86(103.63) |
| <b>2015</b>      | 126.40(40.43)   | 222.26(53.44)   | 177.41(33.82)   | 1334.55(131.31) | 666.78(92.55)   | 1019.18(81.02)  | 1460.94(137.38) | 889.04(106.85)   | 1196.59(87.78)  |
| <b>2016</b>      | 250.28(56.46)   | 301.49(61.85)   | 285.11(42.57)   | 2403.91(174.78) | 1399.65(133.18) | 1888.90(109.48) | 2875.36(191.11) | 1838.92(152.62)  | 2349.35(122.07) |
| <b>1992-2016</b> | -3.2(-6.9,0.6)  | 1.3(-2.3,4.8)   | -1.4(-5.4,2.6)  | 4.5(2.6,6.5)*   | 6.8(2.8,10.7)*  | 5.5(3.3,7.7)*   | 2.7(0.9,4.6)*   | 5.0(2.1,7.9)*    | 3.7(1.4,6.0)*   |
| <b>2008-2016</b> | -5.1(-20.2,9.9) | 5.8(-15.4,27.1) | 0.1(-13.4,13.6) | -2.8(-14.3,8.7) | -1.8(14.6,11.1) | -2.1(-11.8,7.7) | -2.2(-13.1,8.7) | -0.5(-12.6,11.6) | -1.4(-11.3,8.8) |

All data was presented as rate (standard error). Abbreviation: ICH=intracerebral hemorrhage, IS=ischemic stroke. \*P< 0.05.

**Table 3. The proportion of elderly stroke in the first-ever stroke by sex and subtypes.**

| Year         | ICH              |                |                  | IS               |                |                  | Total            |                |                  |
|--------------|------------------|----------------|------------------|------------------|----------------|------------------|------------------|----------------|------------------|
|              | Men              | Women          | Total            | Men              | Women          | Total            | Men              | Women          | Total            |
| 1992         | 5(100.0)         | 2(66.7)        | 7(87.5)          | 5(83.3)          | 4(80.0)        | 9(81.8)          | 10(90.9)         | 6(75.0)        | 16(84.2)         |
| 1993         | 6(100.0)         | 2(66.7)        | 8(88.9)          | 7(70.0)          | 2(50.0)        | 9(64.3)          | 13(81.3)         | 4(57.1)        | 17(73.9)         |
| 1994         | 2(66.7)          | 0              | 2(66.7)          | 7(87.5)          | 7(87.5)        | 14(87.5)         | 9(81.8)          | 7(87.5)        | 16(84.2)         |
| 1995         | 3(75.0)          | 1(33.3)        | 4(57.1)          | 5(35.7)          | 5(45.5)        | 10(40.0)         | 8(44.4)          | 6(42.9)        | 14(43.8)         |
| 1996         | 5(55.6)          | 1(20.0)        | 6(42.9)          | 7(53.8)          | 5(55.6)        | 12(54.5)         | 12(54.5)         | 6(42.9)        | 18(50.0)         |
| 1997         | 3(75.0)          | 0              | 3(60.0)          | 6(50.0)          | 0              | 6(35.3)          | 9(56.3)          | 0              | 9(40.9)          |
| 1998         | 4(100.0)         | 1(33.3)        | 5(71.4)          | 8(66.7)          | 1(25.0)        | 9(56.3)          | 12(75.0)         | 2(28.6)        | 14(60.9)         |
| 1999         | 6(100.0)         | 1(50.0)        | 7(87.5)          | 7(58.3)          | 1(25.0)        | 8(50.0)          | 13(72.2)         | 2(33.3)        | 15(62.5)         |
| 2000         | 1(50.0)          | 2(66.7)        | 3(60.0)          | 13(72.2)         | 8(61.5)        | 21(67.7)         | 14(70.0)         | 10(62.5)       | 24(66.7)         |
| 2001         | 2(50.0)          | 2(100.0)       | 4(66.7)          | 10(66.7)         | 5(71.4)        | 15(68.2)         | 12(63.2)         | 7(77.8)        | 19(76.9)         |
| 2002         | 1(25.0)          | 4(57.1)        | 5(45.5)          | 7(53.8)          | 5(45.5)        | 12(50.0)         | 8(47.1)          | 9(50.0)        | 17(48.6)         |
| 2003         | 1(12.5)          | 4(57.1)        | 5(33.3)          | 15(55.6)         | 9(90.0)        | 24(64.9)         | 16(45.7)         | 13(76.5)       | 29(55.8)         |
| 2004         | 5(71.4)          | 3(60.0)        | 8(66.7)          | 10(58.8)         | 8(57.1)        | 18(58.1)         | 15(62.5)         | 11(57.9)       | 26(60.5)         |
| 2005         | 1(25.0)          | 1(50.0)        | 2(33.3)          | 14(82.4)         | 7(58.3)        | 21(72.4)         | 15(71.4)         | 8(57.1)        | 23(65.7)         |
| 2006         | 1(20.0)          | 0              | 1(14.3)          | 6(40.0)          | 3(33.3)        | 9(37.5)          | 7(35.0)          | 3(27.3)        | 10(32.3)         |
| 2007         | 7(70.0)          | 4(50.0)        | 11(61.1)         | 15(60.0)         | 15(53.6)       | 30(56.6)         | 22(62.9)         | 19(52.8)       | 41(57.7)         |
| 2008         | 3(33.3)          | 1(25.0)        | 4(30.8)          | 22(57.9)         | 11(57.9)       | 33(57.9)         | 25(53.2)         | 12(52.2)       | 37(52.9)         |
| 2009         | 3(25.0)          | 3(42.9)        | 6(31.6)          | 19(59.4)         | 21(67.7)       | 40(63.5)         | 22(50.0)         | 24(63.2)       | 46(56.1)         |
| 2010         | 4(44.4)          | 4(44.4)        | 8(44.4)          | 18(48.6)         | 8(53.3)        | 26(50.0)         | 22(47.8)         | 12(50.0)       | 34(48.6)         |
| 2011         | 1(9.1)           | 1(33.3)        | 2(14.3)          | 11(37.9)         | 8(33.3)        | 19(35.8)         | 12(30.0)         | 9(33.3)        | 21(31.3)         |
| 2012         | 2(22.2)          | 3(30.0)        | 5(26.3)          | 12(44.4)         | 14(58.3)       | 26(51.0)         | 14(38.9)         | 17(50.0)       | 31(44.3)         |
| 2013         | 2(25.0)          | 3(60.0)        | 5(38.5)          | 27(45.8)         | 16(53.3)       | 43(48.3)         | 29(43.3)         | 19(54.3)       | 48(47.1)         |
| 2014         | 4(57.1)          | 2(40.0)        | 6(50.0)          | 10(41.7)         | 17(60.7)       | 27(51.9)         | 14(45.2)         | 19(57.6)       | 33(51.6)         |
| 2015         | 1(33.3)          | 2(50.0)        | 3(42.9)          | 11(37.9)         | 6(37.5)        | 17(37.8)         | 12(37.5)         | 8(40.0)        | 20(38.5)         |
| 2016         | 2(33.3)          | 3(75.0)        | 5(50.0)          | 22(56.4)         | 13(43.3)       | 35(50.7)         | 26(55.3)         | 17(48.6)       | 43(52.4)         |
| <b>Total</b> | -2.7(-4.0,-1.5)* | -0.8(-3.0,1.5) | -1.8(-2.8,-0.9)* | -1.1(-1.8,-0.4)* | -0.5(-1.8,0.8) | -0.8(-1.5,-0.1)* | -1.5(-2.2,-0.8)* | -0.2(-1.3,0.8) | -1.1(-1.8,-0.4)* |

All data was presented as case (%). \*P< 0.05.

**Table 4. Trends in incidence of first-ever stroke during 1992 to 2016 by age and subtypes (95% CI).**

| Age     | ICH                |                   |                    | IS                 |                    |                     | Total               |                    |                    |
|---------|--------------------|-------------------|--------------------|--------------------|--------------------|---------------------|---------------------|--------------------|--------------------|
|         | Men                | Women             | Total              | Men                | Women              | Total               | Men                 | Women              | Total              |
| <65yrs  | 7.7<br>(3.5,11.8)* | 1.8<br>(-1.8,5.4) | 9.1<br>(5.6,12.7)* | 9.9<br>(6.7,13.0)* | 9.5<br>(6.4,12.7)* | 10.0<br>(7.4,12.6)* | 10.3<br>(7.3,13.4)* | 8.9<br>(6.0,11.8)* | 9.5<br>(6.9-12.2)* |
| ≥65 yrs | -3.2<br>(-6.9,0.6) | 1.3<br>(-2.3,4.8) | -1.4<br>(-5.4,2.6) | 4.5<br>(2.6,6.5)*  | 6.8<br>(2.8,10.7)* | 5.5<br>(3.3,7.7)*   | 2.7<br>(0.9,4.6)*   | 5.0<br>(2.1,7.9)*  | 3.7<br>(1.4,6.0)*  |

\*P< 0.05.

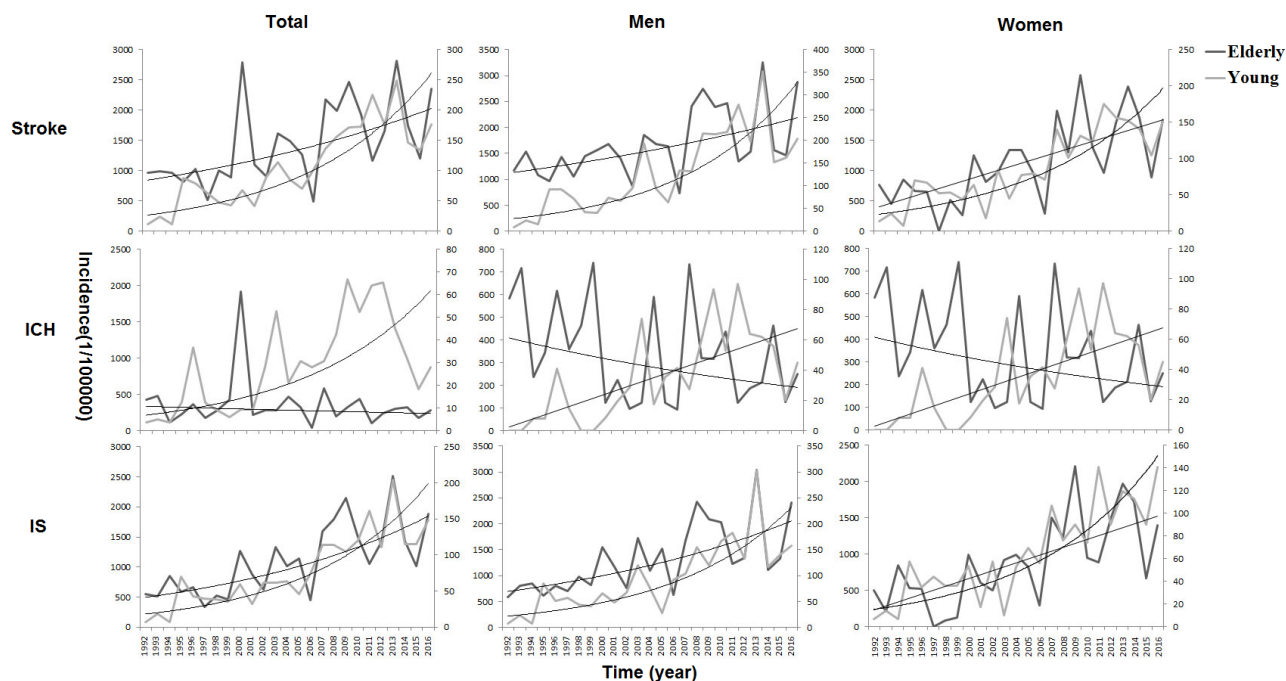

**Figure 1. Annual trends in the incidence of first-ever stroke from 1992 to 2016 by age and subtypes.** The increase in stroke incidence was greater in patients aged <65 compared to those aged ≥65 years. In contrast to findings in the elderly population, the incidence of intracerebral hemorrhage (ICH) increased by 9.1% per year for those aged <65 years. Moreover, the increment was significantly higher in women than in men among the patients aged ≥65 years. However, an opposite trend was observed among the younger patients. Over time, the incidence of stroke in the patients aged <65 years continued to increase, while rates of change in the patients aged ≥65 years tended to slow down by degree, both for the total stroke and ischemic stroke (IS).

## DISCUSSION

This is the first study to report the long-term trends in stroke incidence and stroke subtypes in a Chinese low-income population aged ≥65 years from 1992 to 2016. In this population-based prospective study, we observed an upward trend in the incidence of first-ever stroke among a rural elderly population in China; however, the proportion of older stroke patients in the overall stroke population showed a decreasing trend. Importantly, the annual trend of change in stroke incidence in the population aged ≥65 years tended to be slight, both for total stroke and IS. Between 1992 and 2016, in contrast with rates observed in the younger population, the increase in stroke incidence was significantly higher in women than that in men, among the population aged ≥65 years.

Previous studies have shown that the incidence of stroke in developed countries has declined over the past few decades [9-11]; however, in developing countries, especially in China, the incidence has increased [12-14]. From 1999 to 2008, the incidence of stroke dropped by 29% in the United Kingdom [15]. In the United States, a cohort study of four communities showed that stroke incidence rates among Whites and Blacks, as well as in

men and women, dropped significantly between 1987 and 2011 [16]. In South Korea, from 2006 to 2010, the age-standardized incidence of stroke fell from 173/100,000 to 135/100,000 population [17]. In contrast, the incidence of stroke in China has risen over the past few decades. The annual incidence of first-ever stroke among adults aged 40–74 years increased steadily from 189 cases per 100,000 in 2002 to 379 cases per 100,000 population in 2013, resulting in an average annual increase of 8.3% [18]. From 1992 to 2015, the annual incidence of stroke in this study population increased by 12% [19].

Simultaneously, a study in the United States demonstrated that the incidence of stroke among those aged ≥ 65 years showed a decreasing trend by age [16]. It has been reported that the incidence of IS among 35–64-year-old men and women in the Netherlands increased by 20% and 33%, respectively, between 1997 and 2005, and that there was no change in those aged ≥65 years [20]. A Swedish study reported that from 1987 to 2010, the incidence of IS significantly decreased between the age of 65 and 84 years [21]. In contrast to the findings from Western studies, in this study, the age-standardized incidence of stroke increased by 3.7% per year from 1992 to 2016 in the population aged ≥65 years, and the



incidence of IS increased at an annual rate of 5.5%. However, the incidence of ICH has not changed over the past 25 years. The reasons for this may be that there were too few cases of hemorrhagic stroke in this population. Importantly, the results of this study showed that over time, the proportion of elderly stroke patients in the overall stroke population was declining. The same trend existed for both IS and ICH. This result showed that the annual trends of change in stroke incidence in the population aged  $\geq 65$  years tended to be only slight.

The reason for this phenomenon may be changes in the risk factors for stroke. From 1991 to 2011, in this study population, the prevalence of hypertension in those aged 45–64 years increased by 33%, while the prevalence of hypertension in patients aged  $\geq 65$  years did not change. A similar trend has been observed in the consumption of alcohol. The current prevalence of smoking has declined over the past two decades, but an increase of 58% was observed among people  $< 45$  years of age [22]. In addition, our previous study showed that the rate of hypertension awareness increased significantly in patients aged 55–64 years, but control and treatment rates increased to a far greater degree in patients aged 65–74 years from 1991 to 2011 [23].

A Swedish study showed that if the incidence of stroke remains constant, the absolute incidence of stroke will increase by 70% and 50% in men and women, respectively, by 2050 [24]. In this study, from 1992 to 2016, the age-standardized incidence of stroke among men aged  $\geq 65$  years was higher than that in women, almost every year; however, the increase in stroke incidence among older women was higher than that in men. This phenomenon differs from the findings observed in the younger population ( $< 65$  years). A previous study in this population showed that the incidence of stroke among men aged 45–64 years increased at a higher rate than that among women [19].

In elderly women, the higher annual percentage of change may in part be associated with the 12.8-fold increase in the prevalence of diabetes mellitus among these elderly women, from 1991 to 2011 [25]. Additionally, this native neuroprotection is lost within ten years of menopause [26, 27]; this may partly explain the increased stroke incidence among elderly women.

Moreover, in this study population, the average level of education of older women was significantly lower than that of men. Lower educational level is also associated with increased stroke risk in elderly women; it is partially mediated by known risk factors, particularly lifestyle and biological factors [28].

There are several limitations to this study. First, the study population was drawn from a town in northern China that

was not representative of the entire population. However, because this study focused on trends in the incidence of first-ever stroke among low-income Chinese elderly population, the large population study design and long study period might have reduced the impact of this on the results of this study. In line with the stroke guidelines, the study population met the criteria of  $\geq 100,000$  person-years observation period [29]. Second, the proportion of CT/MRI diagnoses (67.3%) among stroke patients aged  $\geq 65$  years was less than the recommended 80%, between 1992 and 2016. However, we assessed symptomatic stroke in this study, and all stroke events were verified by a senior neurologist from Tianjin Medical University General Hospital. Finally, when the incidence rates observed in this study were compared with those in other studies, the standardized assessment of the incidence in different populations might have affected the accuracy of the comparison. However, in this study, we discussed the trends in stroke incidence rather than the absolute incidence of stroke and this may reduce the impact of the differences in the reference populations.

## CONCLUSIONS

This is the first report to demonstrate the long-term trends in the incidence of stroke among those aged  $\geq 65$  years in a low-income, low-educational population in Tianjin, China. The results of this study showed that, over time, the annual trend of change in stroke incidence in this elderly population tended to be only slight. However, in contrast to trends observed in a younger population, the incidence of stroke in older women was significantly higher than that in older men. These findings indicate that it is crucial to control the risk factors among elderly people, especially among older women, to reduce the burden of stroke in China.

## MATERIALS AND METHODS

### Study population

This study was part of the Tianjin Brain Study, and the study population and design have been described previously [19,22,23,25,30-33]. In 1985, we selected the population of Yangjinzhuang to monitor the epidemiological trends of stroke in Tianjin, China. Stroke events and stroke-related deaths have been recorded since 1985. This population included 15,438 people in 1985, 95% of whom were low-income farmers, distributed among 18 administrative villages. The main source of income was cereal crop production, with a per capita income  $< 100$  US dollars in 1990 and  $< 2000$  US dollars in 2015 [34]. In 1991, the illiteracy rate among residents aged 35 to 74 years was 30% for men and 40% for women. Demographic characteristics remained stable during the study period [23].

In this study, we analyzed the incidence of the first-ever stroke beginning from 1992, when new diagnostic imaging techniques became available for this population.

The investigative protocol was approved by the ethics committee of Tianjin Medical University General Hospital, and a written informed consent was obtained from each family member.

### Stroke surveillance and quality control

During the periods of surveillance, all stroke events and all-cause deaths were recorded and followed up. Stroke events were reported according to predefined procedures, which included dead patients. Local licensed village physicians reported initial stroke events to the community hospital within 24 hours of onset. Then, community hospital physicians visited the surviving patients' homes to obtain information on clinical features, and stroke events were confirmed within 72 hours. They reported confirmed stroke events (diagnosis by imaging) monthly to Tianjin Medical University General Hospital, and suspected events (no imaging performed) were reported in a timely manner. The diagnostic review group, including five senior neurologists from Tianjin Medical University General Hospital, confirmed the suspected cases by door-to-door interview, as soon as possible.

Furthermore, changes in all demographic information were registered, including births, deaths, immigrations (due to marriages), and emigrations (due to entry to high school, university, or work in the city). However, peasant workers were included in this study because all residents working in cities are seasonal workers who return to townships at least four times a year.

### Definition of stroke events

First-ever stroke was defined as the first occurrence (no history of stroke in prior medical records) of rapidly developing signs of focal neurologic disturbance of presumed vascular etiology lasting >24 hours [35]. All stroke events were symptomatic strokes and were diagnosed using pre-defined clinical features and imaging evidence. Stroke events included ICH, IS, and unknown. IS was defined as thrombotic cerebral infarction, cardioembolic stroke, or lacunar infarct. In this study, those patients with subarachnoid hemorrhage, transient ischemic attacks, suspected stroke deaths without imaging evidence or confirmation by a Tianjin Medical University General Hospital neurologist, and silent stroke detected only by imaging were excluded. All patients who were confirmed to have stroke underwent alternative CT or MRI examination at a county center hospital. ICH and IS were analyzed in this study.

### Statistical analysis

Stroke incidence was analyzed separately for the time periods 1992 to 2006, and 2007 to 2016. Age-standardized incidence rates of first-ever stroke were calculated assuming a Poisson distribution, using the direct method, standardized according to the world standard population [33]. Age-specific stroke incidence during the study periods was estimated for two age groups: <65 years and ≥65 years. Trends in the age-standardized incidence of stroke were expressed as the annual percentage of change using the regression model  $\log(rt) = a + bt$ , where  $\log$  denoted the natural logarithm and  $t$  the year. The trend  $b$  was estimated from ordinary regression, and  $100b$  represented the estimated annual percentage of change of incidence [36]. Statistical significance was defined as  $P < 0.05$ . SPSS version 19.0 for Windows (SPSS Inc., Chicago, IL) was used for the analyses.

### AUTHOR CONTRIBUTIONS

XN, JW, JZ were involved in conception and design, and data interpretation for this article. XN, JZ obtained funding for this study. HL, ZG, JL, HZ, WZ, YW, JN, WL, JT, JW, XJ were involved in data collection, case diagnosis, and confirmation for this article. HL was involved in manuscript drafting. JW was involved in data analysis for this article. XN, JW, JZ were involved in critical review of this article.

### ACKNOWLEDGMENTS

We thank all participants of the Tianjin Brain Study.

### CONFLICTS OF INTEREST

The authors declare no competing financial interests.

### FUNDING

This study was funded by the Ministry of Science and Technology of the People's Republic of China (contracts 75-62-02-21, 85-915-01-01, 2006BAI01A01).

### REFERENCES

1. Feigin VL, Mensah GA, Norrving B, Murray CJ, Roth GA, and GBD 2013 Stroke Panel Experts Group. Atlas of the Global Burden of Stroke (1990-2013): the GBD 2013 Study. *Neuroepidemiology*. 2015; 45:230–36. <https://doi.org/10.1159/000441106>
2. Feigin VL, Forouzanfar MH, Krishnamurthi R, Mensah GA, Connor M, Bennett DA, Moran AE, Sacco RL,

- Anderson L, Truelsen T, O'Donnell M, Venketasubramanian N, Barker-Collo S, et al, and Global Burden of Diseases, Injuries, and Risk Factors Study 2010 (GBD 2010) and the GBD Stroke Experts Group. Global and regional burden of stroke during 1990-2010: findings from the Global Burden of Disease Study 2010. *Lancet*. 2014; 383:245–54. [https://doi.org/10.1016/S0140-6736\(13\)61953-4](https://doi.org/10.1016/S0140-6736(13)61953-4)
3. Kalkonde YV, Sahane V, Deshmukh MD, Nila S, Mandava P, Bang A. High prevalence of stroke in rural Gadchiroli, India: a community-based study. *Neuroepidemiology*. 2016; 46:235–39. <https://doi.org/10.1159/000444487>
  4. Chang T, Gajasinghe S, Arambepola C. Prevalence of stroke and its risk factors in urban Sri Lanka: population-based study. *Stroke*. 2015; 46:2965–68. <https://doi.org/10.1161/STROKEAHA.115.010203>
  5. Khedr EM, Fawi G, Abdela M, Mohammed TA, Ahmed MA, El-Fetoh NA, Zaki AF. Prevalence of ischemic and hemorrhagic strokes in Qena Governorate, Egypt: community-based study. *J Stroke Cerebrovasc Dis*. 2014; 23:1843–48. <https://doi.org/10.1016/j.jstrokecerebrovasdis.2014.03.001>
  6. de Jesús Llibre J, Valhuerdi A, Fernández O, Llibre JC, Porto R, López AM, Marcheco B, Moreno C. Prevalence of stroke and associated risk factors in older adults in Havana City and Matanzas Provinces, Cuba (10/66 population-based study). *MEDICC Rev*. 2010; 12:20–26.
  7. Wang W, Jiang B, Sun H, Ru X, Sun D, Wang L, Wang L, Jiang Y, Li Y, Wang Y, Chen Z, Wu S, Zhang Y, et al, and NESS-China Investigators. Prevalence, incidence, and mortality of stroke in China: results from a Nationwide Population-Based Survey of 480 687 adults. *Circulation*. 2017; 135:759–71. <https://doi.org/10.1161/CIRCULATIONAHA.116.025250>
  8. Wang Z, Hu S, Sang S, Luo L, Yu C. Age-period-cohort analysis of stroke mortality in China: data from the Global Burden of Disease Study 2013. *Stroke*. 2017; 48:271–75. <https://doi.org/10.1161/STROKEAHA.116.015031>
  9. Rothwell PM, Coull AJ, Giles MF, Howard SC, Silver LE, Bull LM, Gutnikov SA, Edwards P, Mant D, Sackley CM, Farmer A, Sandercock PA, Dennis MS, et al, and Oxford Vascular Study. Change in stroke incidence, mortality, case-fatality, severity, and risk factors in Oxfordshire, UK from 1981 to 2004 (Oxford Vascular Study). *Lancet*. 2004; 363:1925–33. [https://doi.org/10.1016/S0140-6736\(04\)16405-2](https://doi.org/10.1016/S0140-6736(04)16405-2)
  10. Islam MS, Anderson CS, Hankey GJ, Hardie K, Carter K, Broadhurst R, Jamrozik K. Trends in incidence and outcome of stroke in Perth, Western Australia during 1989 to 2001: the Perth Community Stroke Study. *Stroke*. 2008; 39:776–82. <https://doi.org/10.1161/STROKEAHA.107.493643>
  11. Anderson CS, Carter KN, Hackett ML, Feigin V, Barber PA, Broad JB, Bonita R, and Auckland Regional Community Stroke (ARCOS) Study Group. Trends in stroke incidence in Auckland, New Zealand, during 1981 to 2003. *Stroke*. 2005; 36:2087–93. <https://doi.org/10.1161/01.STR.0000181079.42690.bf>
  12. Valovirta I, Halkka O. Colour polymorphism in northern peripheral populations of *Cepaea hortensis*. *Hereditas*. 1976; 83:123–26. <https://doi.org/10.1111/j.1601-5223.1976.tb01576.x>
  13. Liu M, Wu B, Wang WZ, Lee LM, Zhang SH, Kong LZ. Stroke in China: epidemiology, prevention, and management strategies. *Lancet Neurol*. 2007; 6:456–64. [https://doi.org/10.1016/S1474-4422\(07\)70004-2](https://doi.org/10.1016/S1474-4422(07)70004-2)
  14. Jeng JS, Su TC. Epidemiological studies of cerebrovascular diseases and carotid atherosclerosis in Taiwan. *Acta Neurol Taiwan*. 2007; 16:190–202.
  15. Lee S, Shafe AC, Cowie MR. UK stroke incidence, mortality and cardiovascular risk management 1999-2008: time-trend analysis from the General Practice Research Database. *BMJ Open*. 2011; 1:e000269. <https://doi.org/10.1136/bmjopen-2011-000269>
  16. Koton S, Schneider AL, Rosamond WD, Shahar E, Sang Y, Gottesman RF, Coresh J. Stroke incidence and mortality trends in US communities, 1987 to 2011. *JAMA*. 2014; 312:259–68. <https://doi.org/10.1001/jama.2014.7692>
  17. Kim RB, Kim BG, Kim YM, Seo JW, Lim YS, Kim HS, Lee HJ, Moon JY, Kim KY, Shin JY, Park HK, Song JK, Park KS, et al. Trends in the incidence of hospitalized acute myocardial infarction and stroke in Korea, 2006-2010. *J Korean Med Sci*. 2013; 28:16–24. <https://doi.org/10.3346/jkms.2013.28.1.16>
  18. Guan T, Ma J, Li M, Xue T, Lan Z, Guo J, Shen Y, Chao B, Tian G, Zhang Q, Wang L, Liu Y. Rapid transitions in the epidemiology of stroke and its risk factors in China from 2002 to 2013. *Neurology*. 2017; 89:53–61. <https://doi.org/10.1212/WNL.0000000000004056>
  19. Ning X, Sun J, Jiang R, Lu H, Bai L, Shi M, Tu J, Wu Y, Wang J, Zhang J. Increased Stroke burdens among the low-income young and middle aged in rural China. *Stroke*. 2017; 48:77–83. <https://doi.org/10.1161/STROKEAHA.116.014897>

20. Vaartjes I, O'Flaherty M, Capewell S, Kappelle J, Bots M. Remarkable decline in ischemic stroke mortality is not matched by changes in incidence. *Stroke*. 2013; 44:591–97. <https://doi.org/10.1161/STROKEAHA.112.677724>
21. Rosengren A, Giang KW, Lappas G, Jern C, Torén K, Björck L. Twenty-four-year trends in the incidence of ischemic stroke in Sweden from 1987 to 2010. *Stroke*. 2013; 44:2388–93. <https://doi.org/10.1161/STROKEAHA.113.001170>
22. Wang J, Bai L, Shi M, Yang L, An Z, Li B, Zhao W, Gu H, Zhan C, Tu J, Ning X. Trends in age of first-ever stroke following increased incidence and life expectancy in a low-income chinese population. *Stroke*. 2016; 47:929–35. <https://doi.org/10.1161/STROKEAHA.115.012466>
23. Wang J, Ning X, Yang L, Lu H, Tu J, Jin W, Zhang W, Su TC. Trends of hypertension prevalence, awareness, treatment and control in rural areas of northern China during 1991-2011. *J Hum Hypertens*. 2014; 28:25–31. <https://doi.org/10.1038/jhh.2013.44>
24. Modig K, Drefahl S, Andersson T, Ahlbom A. The aging population in Sweden: can declining incidence rates in MI, stroke and cancer counterbalance the future demographic challenges? *Eur J Epidemiol*. 2012; 27:139–45. <https://doi.org/10.1007/s10654-012-9653-2>
25. Wang J, Ning X, Yang L, Tu J, Gu H, Zhan C, Zhang W, Su TC. Sex differences in trends of incidence and mortality of first-ever stroke in rural Tianjin, China, from 1992 to 2012. *Stroke*. 2014; 45:1626–31. <https://doi.org/10.1161/STROKEAHA.113.003899>
26. Krause DN, Duckles SP, Pelligrino DA. Influence of sex steroid hormones on cerebrovascular function. *J Appl Physiol* (1985). 2006; 101:1252–61. <https://doi.org/10.1152/jappphysiol.01095.2005>
27. McCullough LD, Hurn PD. Estrogen and ischemic neuroprotection: an integrated view. *Trends Endocrinol Metab*. 2003; 14:228–35. [https://doi.org/10.1016/S1043-2760\(03\)00076-6](https://doi.org/10.1016/S1043-2760(03)00076-6)
28. Jackson CA, Jones M, Mishra GD. Educational and homeownership inequalities in stroke incidence: a population-based longitudinal study of mid-aged women. *Eur J Public Health*. 2014; 24:231–36. <https://doi.org/10.1093/eurpub/ckt073>
29. National Center for Cardiovascular Diseases. China. Report on Cardiovascular Diseases in China (2015). Beijing: Encyclopedia of China Publishing House; 2016: 298–301.
30. Wang J, An Z, Li B, Yang L, Tu J, Gu H, Zhan C, Liu B, Su TC, Ning X. Increasing stroke incidence and prevalence of risk factors in a low-income Chinese population. *Neurology*. 2015; 84:374–81. <https://doi.org/10.1212/WNL.0000000000001175>
31. Lu H, Bai L, Zhan C, Yang L, Tu J, Gu H, Shi M, Wang J, Ning X. Cardiovascular risk factors among low-income women: a population-based study in China from 1991 to 2011. *J Womens Health (Larchmt)*. 2016; 25:1276–81. <https://doi.org/10.1089/jwh.2015.5618>
32. Li B, Lou Y, Gu H, Long X, Wang T, Wei J, Wang J, Tu J, Ning X. Trends in incidence of stroke and transition of stroke subtypes in rural Tianjin China: a population-based study from 1992 to 2012. *PLoS One*. 2015; 10:e0139461. <https://doi.org/10.1371/journal.pone.0139461>
33. Ning X, Zhan C, Yang Y, Yang L, Tu J, Gu H, Su TC, Wang J. Secular trends in prevalence of overweight and obesity among adults in rural Tianjin, China from 1991 to 2011: a population-based study. *PLoS One*. 2014; 9:e116019. <https://doi.org/10.1371/journal.pone.0116019>
34. National Bureau of Statistics of China. In *China Statistical Yearbook–2016* (2016). Beijing: China Statistics Press; 2016.
35. Aho K, Harmsen P, Hatano S, Marquardsen J, Smirnov VE, Strasser T. Cerebrovascular disease in the community: results of a WHO collaborative study. *Bull World Health Organ*. 1980; 58:113–30.
36. Zhao D, Liu J, Wang W, Zeng Z, Cheng J, Liu J, Sun J, Wu Z. Epidemiological transition of stroke in China: twenty-one-year observational study from the Sino-MONICA-Beijing Project. *Stroke*. 2008; 39:1668–74. <https://doi.org/10.1161/STROKEAHA.107.502807>
